# Supplementary material for: Chloride-incorporated quasi-2D perovskite filmsviadynamic processing for spectrum-stable blue light-emitting diodes
Source: Royal Society of Chemistry journal article supplement (doi:10.1039/d1tc02662c), 2021-01-01
Supplement: d1tc02662c1.pdf [file d1tc02662c1.pdf]

## Supporting Information

### Chloride-incorporated quasi-2D perovskite films via a dynamic processing for spectra-stable blue light-emitting diodes

*Jing Chen,<sup>1</sup> Yan Jin,<sup>1</sup> Yan-Hui Lou,<sup>2,\*</sup> Shuai Yuan,<sup>1</sup> Yu-Huang Zhou,<sup>1</sup> Kai-Li Wang,<sup>1</sup> and Zhao-Kui Wang<sup>1,\*</sup>*

<sup>1</sup> Institute of Functional Nano & Soft Materials (FUNSOM), Soochow University, Suzhou, Jiangsu 215123, China

<sup>2</sup> School of Energy, Soochow Institute for Energy and Materials Innovations, Soochow University, Suzhou, Jiangsu 215006, China

E-mail: [yhlou@suda.edu.cn](mailto:yhlou@suda.edu.cn); [zkwang@suda.edu.cn](mailto:zkwang@suda.edu.cn);

## Contents

**Figure S1.** XPS spectra of N 1s of perovskite films with/without MACl treatment.

**Figure S2.** Full XPS spectra of perovskite films with/without MACl treatment.

**Figure S3.** Current efficiency-voltage characteristics of devices with/without MACl treatment.

**Figure S4.** Power efficiency-voltage characteristics of devices with/without MACl treatment.

**Table S1.** The lifetime constants fitted in triexponential function for TRPL decay measurement of the CsPbBr<sub>3</sub>:PEABr films with/without MACl treatment.

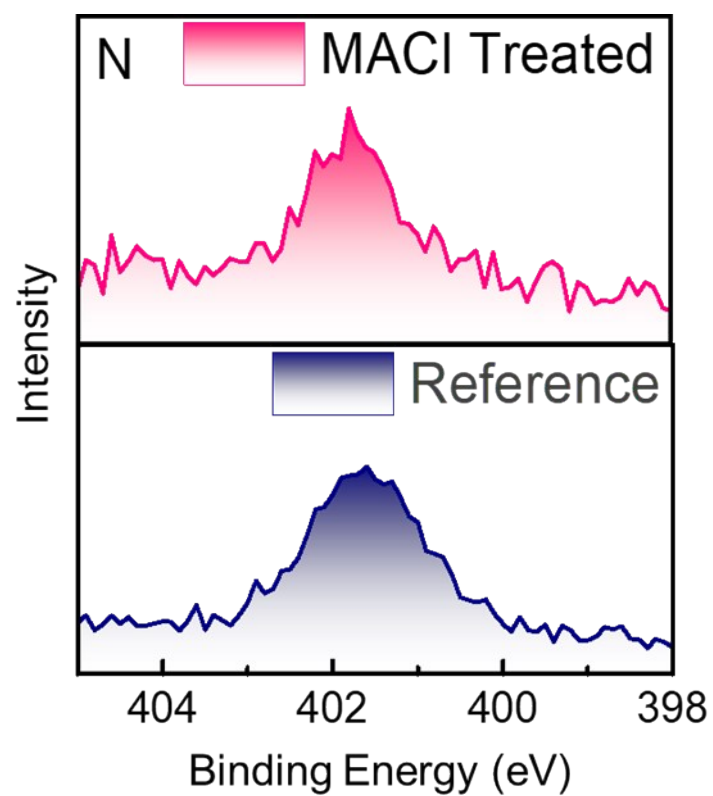

**Figure S1.** XPS spectra of N 1s of perovskite films with/without MACl treatment.

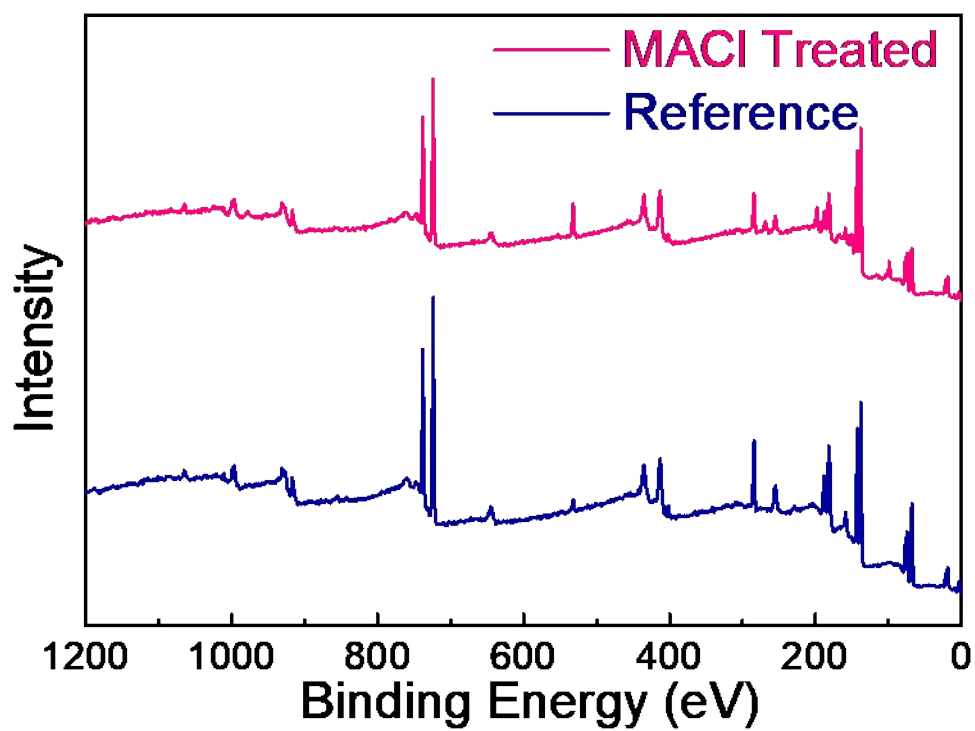

**Figure S2.** Full XPS spectra of perovskite films with/without MACl treatment.

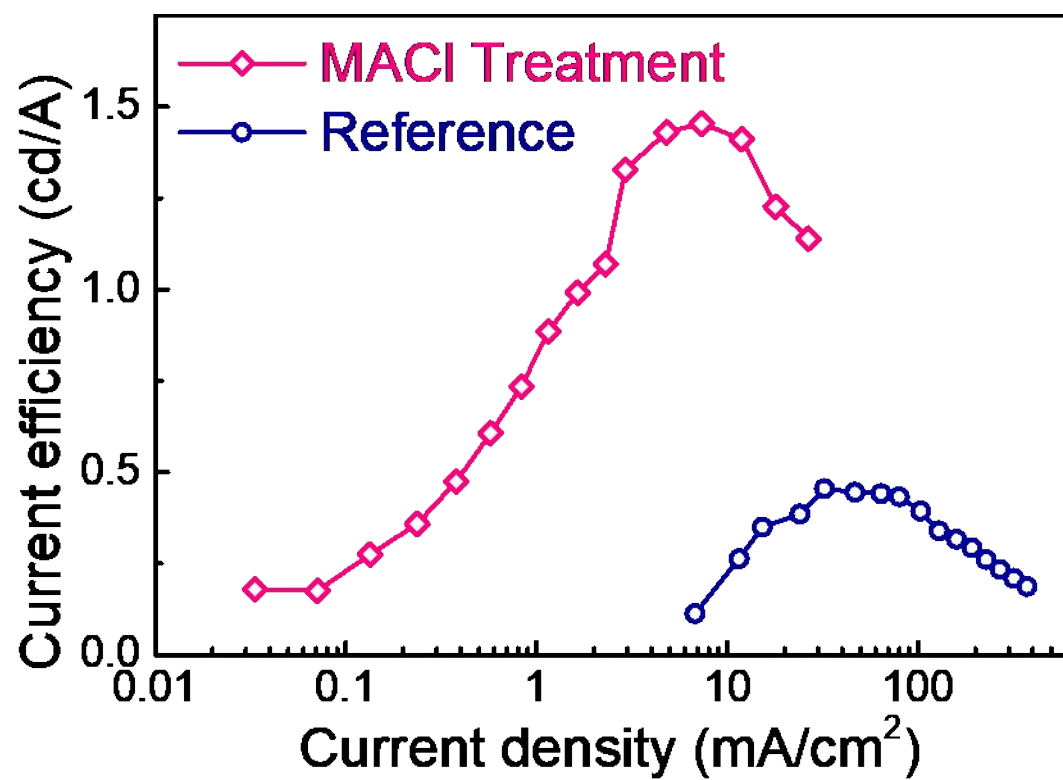

**Figure S3.** Current efficiency-voltage characteristics of devices with/without MACI treatment.

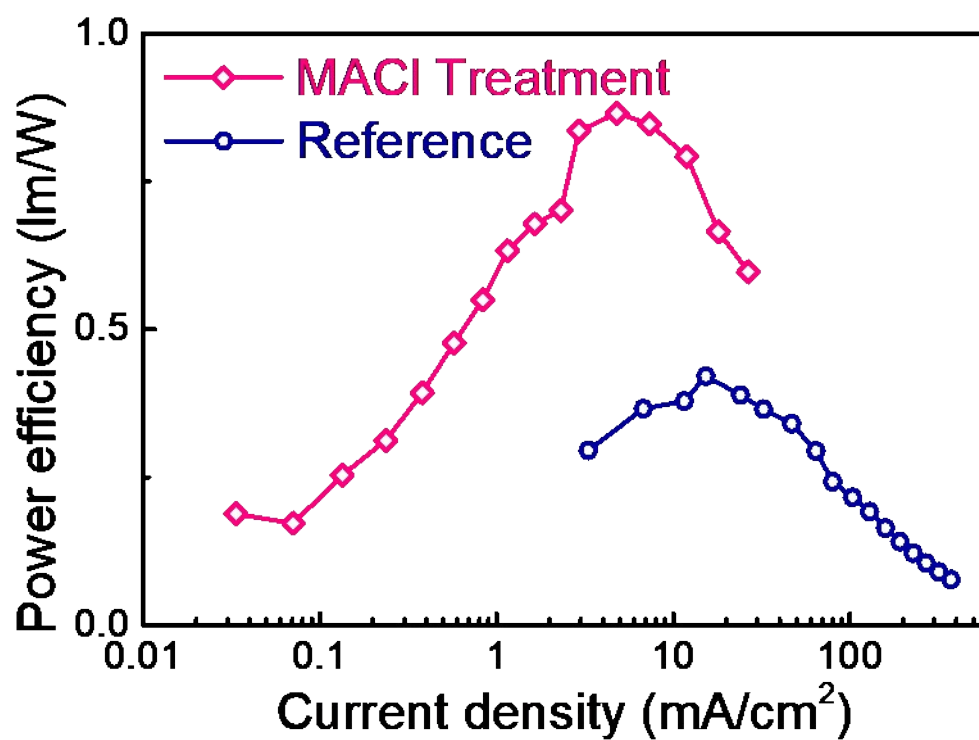

**Figure S4.** Power efficiency-voltage characteristics of devices with/without MACI treatment.

**Table. S1:** The lifetime constants fitted in triexponential function for TRPL decay measurement of the CsPbBr<sub>3</sub>:PEABr films with/without MACl treatment.

|                | $\langle\tau\rangle$ (ns) | $\langle\tau_1\rangle$ (ns) | $\langle\tau_2\rangle$ (ns) | $\langle\tau_3\rangle$ (ns) |
|----------------|---------------------------|-----------------------------|-----------------------------|-----------------------------|
| MACl Treatment | 41.60                     | 4.24                        | 26.75                       | 202.47                      |
| Reference      | 16.80                     | 0.59                        | 6.04                        | 54.39                       |
